# Supplementary material for: Investigations of electronic and nonlinear optical properties of single alkali metal adsorbed graphene, graphyne and graphdiyne systems by first-principles calculations
Source: Royal Society of Chemistry journal article supplement (doi:10.1039/c8tc05392h), 2018-12-24
Supplement: c8tc05392h1.pdf [file c8tc05392h1.pdf]

*Electronic Supplementary Information*

**Investigations of electronic and nonlinear optical properties of single  
alkali-metal adsorbed graphene, graphyne and graphdiyne  
systems by first-principles calculations**

**Xiaojun Li,<sup>1,3</sup> Shikun Li<sup>2</sup>**

*<sup>1</sup>School of Science, Xi'an University of Posts and Telecommunications, Xi'an 710121,*

*Shaanxi, P. R. China; <sup>2</sup>Institute of Applied and Physical Chemistry, University of Bremen, Bremen*

*D-28359, Germany; <sup>3</sup>School of Chemical Engineering, Xi'an University, Xi'an, P. R. China*

**Contents:**

- Comparison of the exactly calculated static first hyperpolarizability ( $\beta_{\text{tot}}$ ) and estimated by two-level model ( $\Delta\mu \cdot f_0 / \Delta E^3$ ) for these AM@GDY (AM = Li, Na, and K) complexes, Figure S1.....S2
- Simulated optical absorption spectra of AM@GE complexes, Figure S2.....S3
- Simulated optical absorption spectra of AM@GY complexes, Figure S3.....S4
- Oscillator strength, change in dipole moments, and main transitions of crucial excited states, Table S1.....S5

---

\*Corresponding author: E-mail: [xjlicms@163.com](mailto:xjlicms@163.com) (Xiaojun Li)

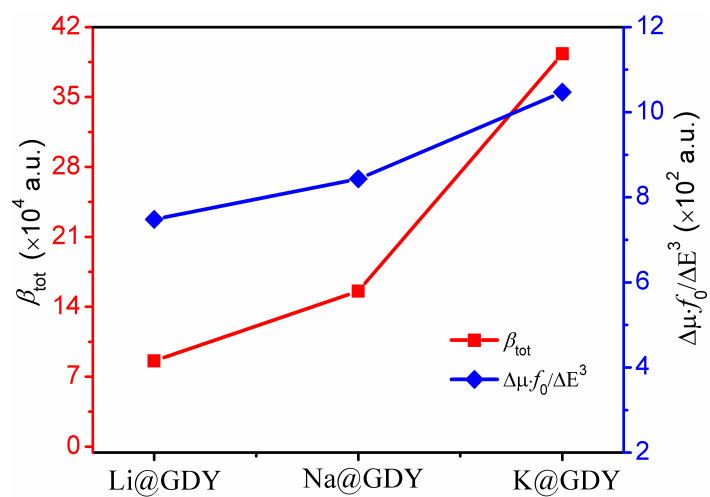

**Figure S1.** Comparison of exactly calculated static first hyperpolarizability ( $\beta_{\text{tot}}$ ) and estimated by two-level model ( $\Delta\mu \cdot f_0 / \Delta E^3$ ) for these AM@GDY (AM = Li, Na, and K) complexes.

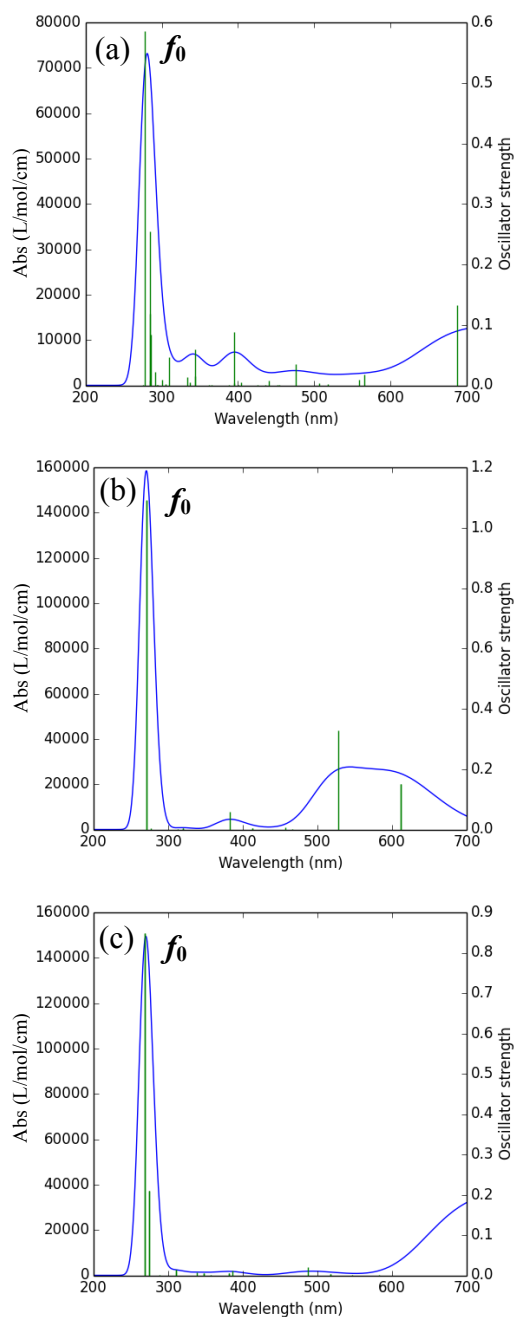

**Figure S2.** Simulated optical absorption spectra of (a) Li@GE, (b) Na@GE, and (c) K@GE complexes using the CAM-B3LYP method. The oscillator strengths of them are inserted.

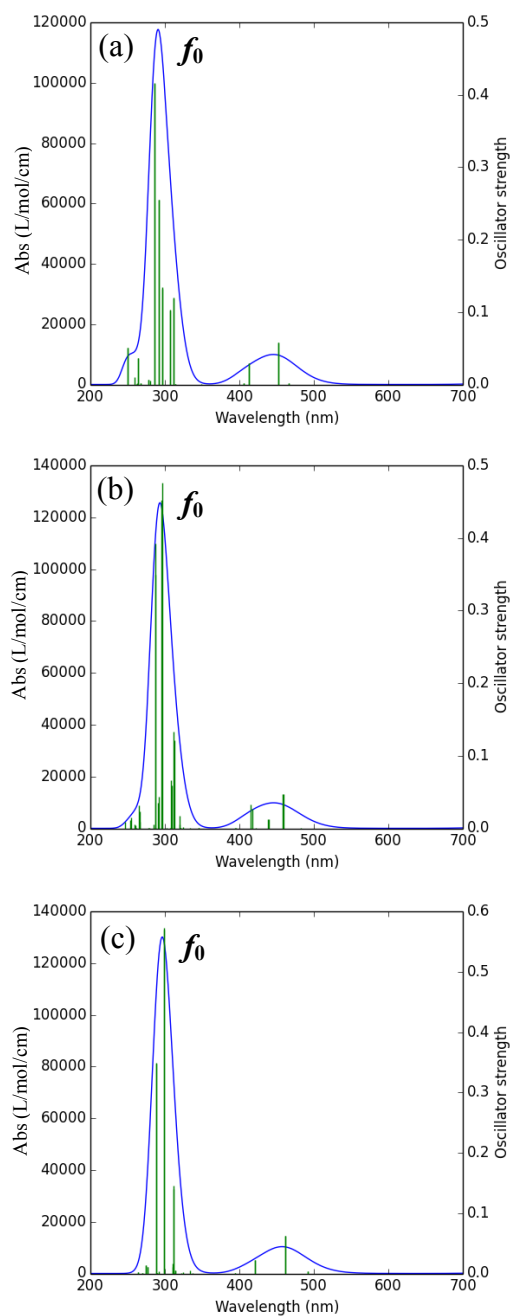

**Figure S3.** Simulated optical absorption spectra of (a) Li@GY, (b) Na@GY, and (c) K@GY complexes using the CAM-B3LYP method. The oscillator strengths of them are inserted.

**Table S1.** Maximum oscillator strength ( $f_0$ , in a.u.), the change in dipole moments ( $\Delta\mu$ , in a.u.) between ground and crucial excited states, and main transitions of crucial excited states for AM@GE, AM@GY, and AM@GDY (AM = Li, Na, K) complexes, obtained at the TD-CAM-B3LYP/6-31+G(d) level of theory.

| Complexes | $f_0$  | $\Delta\mu$ | Crucial Transitions <sup>a</sup>                                                                                                                                                                                       |
|-----------|--------|-------------|------------------------------------------------------------------------------------------------------------------------------------------------------------------------------------------------------------------------|
| Li@GE     | 0.5859 | 5.357       | $\alpha\text{H-2} \rightarrow \alpha\text{L}$ (16%)<br>$\alpha\text{H-1} \rightarrow \alpha\text{L+1}$ (17%)<br>$\beta\text{H-1} \rightarrow \beta\text{L}$ (16%)<br>$\beta\text{H} \rightarrow \beta\text{L+1}$ (17%) |
| Na@GE     | 1.0916 | 9.719       | $\alpha\text{H-2} \rightarrow \alpha\text{L}$ (24%)<br>$\alpha\text{H-1} \rightarrow \alpha\text{L+1}$ (24%)<br>$\beta\text{H-1} \rightarrow \beta\text{L}$ (24%)<br>$\beta\text{H} \rightarrow \beta\text{L+1}$ (24%) |
| K@GE      | 0.8477 | 7.5046      | $\alpha\text{H-2} \rightarrow \alpha\text{L}$ (11%)<br>$\alpha\text{H-1} \rightarrow \alpha\text{L+1}$ (11%)<br>$\beta\text{H-1} \rightarrow \beta\text{L}$ (12%)<br>$\beta\text{H} \rightarrow \beta\text{L+1}$ (12%) |
| Li@GY     | 0.4167 | 3.920       | $\beta\text{H} \rightarrow \beta\text{L+2}$ (22%)<br>$\alpha\text{H-1} \rightarrow \alpha\text{L+1}$ (10%)                                                                                                             |
| Na@GY     | 0.4767 | 4.646       | $\alpha\text{H-1} \rightarrow \alpha\text{L+1}$ (25%)<br>$\beta\text{H} \rightarrow \beta\text{L+2}$ (29%)                                                                                                             |
| K@GY      | 0.5727 | 5.629       | $\alpha\text{H-1} \rightarrow \alpha\text{L+1}$ (30%)<br>$\beta\text{H} \rightarrow \beta\text{L+5}$ (30%)                                                                                                             |
| Li@GDY    | 0.5314 | 3.228       | $\alpha\text{H-2} \rightarrow \alpha\text{L}$ (43%)<br>$\beta\text{H-1} \rightarrow \beta\text{L}$ (23%)                                                                                                               |
| Na@GDY    | 0.4349 | 4.374       | $\alpha\text{H-2} \rightarrow \alpha\text{L}$ (24%)<br>$\beta\text{H-1} \rightarrow \beta\text{L}$ (19%)                                                                                                               |
| K@GDY     | 0.3344 | 7.044       | $\alpha\text{H-2} \rightarrow \alpha\text{L}$ (41%)<br>$\beta\text{H-1} \rightarrow \beta\text{L}$ (13%)                                                                                                               |

<sup>a</sup>H = HOMO, L = LUMO.
